# Supplementary material for: High-Temperature Hydrothermal Extraction of Phenolic Compounds from Brewer’s Spent Grain and Malt Dust Biomass Using Natural Deep Eutectic Solvents
Source: MDPI journal article supplement (doi:10.3390/molecules29091983), 2024-04-25
Supplement: s1 [file s1]

## Supplementary material

### S1. GC-MS of biomass before/after extraction using HTE method

*Table S1: py-GC-MS analysis of untreated BSG before extraction (BSG-RAW), compared to BSG after extraction using HTE (BSG-HTE-GLY, BSG-HTE-MA). Identified peaks are given with their relative peak areas, as well as designations of their origin (p-Cou: p-Coumaric acid; Cell: cellulose; Hemi: hemicellulose)*

#### Torrefaction – 300 °C

| RET.<br>TIME<br><br>(min.) | COMPOUND                                  | RAW<br><br>Rel. Area<br>(%) | HTE-<br>GLY<br><br>Rel. Area<br>(%) | HTE-MA<br><br>Rel. Area<br>(%) | ORIGIN     | REFERENCE |
|----------------------------|-------------------------------------------|-----------------------------|-------------------------------------|--------------------------------|------------|-----------|
| 2,041                      | Carbon dioxide                            | 7.55                        | 8.17                                | 6.19                           |            |           |
| 2,095                      | Chloromethane                             | 0.00                        | 0.64                                | 14.64                          |            |           |
| 2,190                      | Acetaldehyde                              | 0.17                        | 0.27                                | 0.00                           | Lignin     |           |
| 2,228                      | Methylamine, N,N-dimethyl-                | 0.00                        | 0.00                                | 6.88                           | p-Cou      | [62]      |
| 2,269                      | Methanethiol                              | 0.21                        | 0.42                                | 0.84                           |            |           |
| 2,296                      | Methylamine, N,N-dimethyl-                | 0.00                        | 0.97                                | 0.00                           |            |           |
| 2,473                      | Butane                                    | 0.00                        | 0.35                                | 0.00                           |            |           |
| 3,337                      | Acetic acid                               | 4.50                        | 4.87                                | 0.71                           | Cell/ Hemi |           |
| 3,823                      | 2-Propanone,1-hydroxy-                    | 0.30                        | 0.37                                | 0.00                           | Cell/ Hemi | [63]      |
| 3,843                      | 2-Chloroethanol                           | 0.00                        | 0.00                                | 0.44                           |            |           |
| 4,398                      | N,N-Dimethylaminoethanol                  | 0.00                        | 0.00                                | 34.25                          | p-Cou      | [62]      |
| 4,687                      | Butane,1,2:3,4-diepoxy-,                  | 0.60                        | 1.80                                | 0.00                           |            |           |
| 4,558                      | Ethanamine, 2-chloro-N,N-dimethyl-        | 0.00                        | 0.00                                | 6.16                           |            |           |
| 5,272                      | Propanenitrile, 2-(dimethylamino)-        | 0.00                        | 0.00                                | 0.19                           |            |           |
| 5,653                      | Furfural                                  | 2.86                        | 2.73                                | 0.20                           | Cell/ Hemi |           |
| 5,938                      | 2-Furanmethanol                           | 0.62                        | 0.69                                | 0.41                           | Cell/ Hemi |           |
| 6,085                      | 2-Propanone, 1-(acetyloxy)-               | 0.36                        | 0.29                                | 0.30                           | Cell/ Hemi |           |
| 6,741                      | Acetic acid, 2-(dimethylamino)ethyl ester | 0.00                        | 1.11                                | 0.78                           | Hemi       |           |
| 7,513                      | Butanedioic acid, cyclic hydrazide        | 0.87                        | 1.93                                | 0.00                           |            |           |

|        |                                                                 |      |       |      |            |      |
|--------|-----------------------------------------------------------------|------|-------|------|------------|------|
| 8,081  | N-Butyl-tert-butylamine                                         | 3.92 | 6.96  | 0.73 |            |      |
| 8,622  | 3(2H)-Furanone, 4-hydroxy-5-methyl-                             | 1.15 | 2.03  | 0.00 | Cell/ Hemi |      |
| 10,268 | 4H-Pyran-4-one, 2,3-dihydro-3,5-dihydroxy-6-methyl-             | 0.17 | 0.00  | 0.00 |            |      |
| 11,302 | Benzofuran, 2,3-dihydro-                                        | 0.00 | 1.88  | 0.00 | Cell/ Hemi |      |
| 11,938 | Saccharide                                                      | 0.00 | 11.59 | 0.00 |            |      |
| 11,081 | N,N-Dimethylaminoethanol                                        | 0.00 | 0.00  | 1.57 |            |      |
| 12,680 | 2-Methoxy-4-vinylphenol                                         | 4.31 | 3.67  | 0.26 | lignin     | [64] |
| 12,826 | Saccharide                                                      | 0.00 | 6.58  | 0.00 |            |      |
| 13,492 | L-Proline, 5-oxo-, methyl ester                                 | 0.00 | 0.00  | 0.00 | protein    | [64] |
| 15,312 | $\beta$ -D-Glucopyranose, 1,6-anhydro-                          | 5.86 | 5.33  | 1.29 | Cell       | [65] |
| 20,172 | n-Hexadecanoic acid                                             | 9.76 | 4.54  | 0.00 | Lignin     | [66] |
| 15,662 | L-Glutamine                                                     | 0.00 | 0.00  | 0.53 | protein    |      |
| 18,764 | Cyclo(L-prolyl-L-valine)                                        | 0.00 | 0.00  | 0.16 | protein    |      |
| 19,914 | Pyrrolo[1,2-a]pyrazine-1,4-dione, hexahydro-3-(2-methylpropyl)- | 0.00 | 0.00  | 0.61 | protein    | [66] |
| 20,067 | 5,10-Diethoxy-2,3,7,8-tetrahydro-1H,6H-dipyrrolo pyrazine       | 0.00 | 0.00  | 0.83 |            |      |
| 20,142 | n-Hexadecanoic acid                                             | 0.00 | 0.00  | 0.92 | Hemi       | [67] |
| 21,781 | 10E,12Z-Octadecadienoic acid                                    | 8.99 | 0.41  | 0.24 | Lipid      | [64] |
| 21,856 | cis-Vaccenic acid                                               | 5.98 | 0.64  | 0.52 | Lipid      | [64] |
| 22,050 | Octadecanoic acid                                               | 2.16 | 0.53  | 0.74 | Lipid      | [64] |
| 23,141 | Dimethylaminoethyl palmitate                                    | 0.00 | 0.00  | 0.13 |            |      |
| 23,414 | 2-((8Z,11Z)-Heptadeca-8,11-dien-1-yl)-4,5-dihydrooxazole        | 0.53 | 0.00  | 0.00 |            |      |
| 25,022 | Hexadecanoic acid, 2-hydroxy-1-(hydroxymethyl)ethyl ester       | 1.25 | 0.46  | 0.00 | Lipid      |      |

|        |              |      |      |      |                     |      |
|--------|--------------|------|------|------|---------------------|------|
| 30,855 | β-Sitosterol | 1.27 | 0.50 | 0.00 | lignin<br>glycoside | [68] |
|--------|--------------|------|------|------|---------------------|------|

### Pyrolysis – 550 °C

| RET.<br>TIME<br><br>(min.) | COMPOUND                             | RAW<br><br>Rel.<br>Area<br>(%) | HTE-<br>GLY<br><br>Rel.<br>Area<br>(%) | HTE-<br>MA<br><br>Rel.<br>Area<br>(%) | ORIGIN     | REFERENCE |
|----------------------------|--------------------------------------|--------------------------------|----------------------------------------|---------------------------------------|------------|-----------|
| 1,816                      | Carbon dioxide                       | 10.72                          | 9.50                                   | 15.24                                 |            |           |
| 1,970                      | Methanethiol                         | 0.00                           | 0.00                                   | 4.06                                  |            |           |
| 2,143                      | Butane                               | 4.02                           | 3.83                                   | 4.12                                  |            |           |
| 2,589                      | Acetic acid                          | 3.48                           | 2.91                                   | 0.88                                  | Cell/ Hemi |           |
| 2,670                      | Furan, 3-methyl-                     | 1.08                           | 0.99                                   | 0.92                                  | Cell/ Hemi |           |
| 3,194                      | 2-Propanone, 1-hydroxy-              | 1.61                           | 0.96                                   | 1.07                                  |            |           |
| 3,684                      | Furan, 2,5-dimethyl-                 | 0.54                           | 0.44                                   | 0.65                                  | Cell/ Hemi |           |
| 4,020                      | Butanenitrile, 3-methyl-             | 0.00                           | 0.00                                   | 0.33                                  | Protein    | [69]      |
| 4,276                      | Pyrrole                              | 0.77                           | 0.84                                   | 0.65                                  |            |           |
| 4,537                      | Toluene                              | 3.17                           | 2.39                                   | 3.51                                  |            |           |
| 4,718                      | Succindialdehyde                     | 0.24                           | 0.07                                   | 0.22                                  | Lignin     |           |
| 4,792                      | Propanoic acid, 2-oxo-, methyl ester | 1.04                           | 0.55                                   | 0.82                                  |            |           |
| 4,973                      | Pyrrolidine, 2-butyl-1-methyl-       | 0.72                           | 0.94                                   | 0.89                                  |            |           |
| 5,231                      | 3-Furaldehyde                        | 0.34                           | 0.28                                   | 0.33                                  | Cell/ Hemi |           |
| 5,493                      | Furfural                             | 1.55                           | 1.16                                   | 0.72                                  | Hemi       |           |
| 6,377                      | Styrene                              | 0.23                           | 0.25                                   | 0.59                                  |            |           |
| 6,605                      | 2(5H)-Furanone                       | 0.25                           | 0.00                                   | 0.50                                  | Cell/ Hemi |           |
| 6,803                      | 1,2-Cyclopentanedione                | 1.22                           | 1.16                                   | 1.17                                  | Cell/ Hemi |           |
| 7,428                      | Butanedioic acid, cyclic hydrazide   | 0.77                           | 1.50                                   | 0.00                                  |            |           |
| 7,010                      | N-Methylmaleimide                    | 0.00                           | 0.00                                   | 0.29                                  |            |           |

|        |                                          |       |       |       |               |      |
|--------|------------------------------------------|-------|-------|-------|---------------|------|
| 7,626  | Phenol                                   | 0.53  | 0.59  | 0.79  | Phenol        |      |
| 8,000  | N-Butyl-tert-butylamine                  | 2.03  | 2.59  | 0.00  |               |      |
| 8,357  | 1,2-Cyclopentanedione, 3-methyl-         | 0.49  | 0.40  | 0.59  |               |      |
| 8,551  | 3(2H)-Furanone, 4-hydroxy-5-methyl-      | 0.22  | 0.80  | 0.00  | Cell/ Hemi    |      |
| 9,115  | Phenol, 3-methyl-                        | 1.60  | 1.86  | 1.89  | Lignin        |      |
| 9,357  | Phenol, 2-methoxy-                       | 1.02  | 0.91  | 0.53  | Lignin        |      |
| 9,711  | Maltol                                   | 0.22  | 0.29  | 0.31  |               |      |
| 10,517 | Phenol, 4-ethyl-                         | 0.30  | 0.38  | 0.28  | Lignin        |      |
| 10,792 | 4H-Pyran-4-one, 3,5-dihydroxy-2-methyl-  | 0.30  | 0.52  | 0.40  |               |      |
| 10,925 | Creosol                                  | 1.28  | 1.24  | 0.27  | Phenol        |      |
| 11,289 | Benzofuran, 2,3-dihydro-                 | 0.86  | 1.17  | 1.14  | Cell/ Hemi    |      |
| 12,023 | Saccharide                               | 0.00  | 2.12  | 0.00  |               |      |
| 12,153 | Phenol, 4-ethyl-2-methoxy-               | 0.44  | 0.23  | 0.00  | Lignin        |      |
| 12,299 | 1,2-Benzenediol, 4-methyl-               | 0.24  | 0.00  | 0.00  | Lignin        |      |
| 12,455 | Indole                                   | 0.56  | 0.55  | 0.38  |               |      |
| 12,673 | 2-Methoxy-4-vinylphenol                  | 1.69  | 1.67  | 0.45  | Lignin        | [64] |
| 13,139 | 2,3-Dimethoxyphenol                      | 0.41  | 0.39  | 0.00  | Lignin        |      |
| 13,734 | 1H-Indole, 7-methyl-                     | 0.40  | 0.40  | 0.57  |               |      |
| 14,380 | 3,5-Dimethoxy-4-hydroxytoluene           | 0.55  | 0.86  | 0.00  |               |      |
| 14,493 | Phenol, 2-methoxy-4-(1-propenyl)-        | 0.30  | 0.50  | 0.00  | Guaiacol-type |      |
| 15,299 | $\beta$ -D-Glucopyranose, 1,6-anhydro-   | 15.13 | 21.69 | 23.07 | Cell          |      |
| 15,856 | Phenol, 4-ethenyl-2,6-dimethoxy-         | 0.99  | 0.37  | 0.00  | Syringyl-type | [65] |
| 16,309 | 1,6-Anhydro- $\alpha$ -D-galactofuranose | 0.46  | 0.00  | 0.63  | Cell/ Hemi    |      |

|        |                                                                 |      |      |      |                  |      |
|--------|-----------------------------------------------------------------|------|------|------|------------------|------|
| 17,455 | Phenol, 2,6-dimethoxy-4-(2-propenyl)-                           | 0.26 | 0.25 | 0.16 | Lignin           |      |
| 17,781 | Ethanone, 1-(4-hydroxy-3,5-dimethoxyphenyl)-                    | 0.23 | 0.22 | 0.00 |                  |      |
| 18,142 | Syringylacetone                                                 | 0.06 | 0.00 | 0.00 | Syringyl-type    |      |
| 18,200 | Pyrrolo[1,2-a]pyrazine-1,4-dione, hexahydro-                    | 0.17 | 0.32 | 0.33 |                  |      |
| 18,754 | Cyclo(L-prolyl-L-valine)                                        | 0.11 | 0.00 | 0.17 |                  |      |
| 19,914 | Pyrrolo[1,2-a]pyrazine-1,4-dione, hexahydro-3-(2-methylpropyl)- | 0.30 | 0.00 | 0.61 | protein          |      |
| 20,070 | 5,10-Diethoxy-2,3,7,8-tetrahydro-1H,6H-dipyrrolo pyrazine       | 0.77 | 0.32 | 1.33 |                  |      |
| 20,145 | n-Hexadecanoic acid                                             | 2.84 | 3.91 | 1.04 | Lipid            | [64] |
| 21,785 | 10E,12Z-Octadecadienoic acid                                    | 1.56 | 0.42 | 0.32 | Lipid            | [64] |
| 21,839 | cis-Vaccenic acid                                               | 1.59 | 1.04 | 0.84 | Lipid            | [64] |
| 22,043 | Octadecanoic acid                                               | 0.62 | 0.29 | 0.25 | Hemi             |      |
| 24,043 | Pyrrolo[1,2-a]pyrazine-1,4-dione, hexahydro-3-(phenylmethyl)-   | 0.32 | 0.27 | 0.40 |                  |      |
| 29,288 | β-Sitosterol acetate                                            | 0.44 | 0.25 | 0.00 | lignin glycoside | [68] |
| 30,855 | β-Sitosterol                                                    | 0.31 | 0.15 | 0.00 | lignin glycoside | [68] |

### Supplementary material References

62. Xin, Y.; Shen, X.; Dong, M.; Cheng, X.; Liu, S.; Yang, J.; Wang, Z.; Liu, H.; Han, B. Organic Amine Mediated Cleavage of Caromatic-Cabonds in Lignin and Its Platform Molecules. *Chem. Sci.* 2021, 12, 15110–15115, doi:10.1039/d1sc05231d.
63. Carrier, M.; Windt, M.; Ziegler, B.; Appelt, J.; Saake, B.; Meier, D.; Bridgwater, A. Quantitative Insights into the Fast Pyrolysis of Extracted Cellulose, Hemicelluloses, and Lignin. *ChemSusChem* 2017, 10, 3212–3224, doi:10.1002/cssc.201700984.
64. Sobek, S.; Zeng, K.; Werle, S.; Junga, R.; Sajdak, M. Brewer's Spent Grain Pyrolysis Kinetics and Evolved Gas Analysis for the Sustainable Phenolic Compounds and Fatty Acids Recovery Potential. *Renew. Energy* 2022, 199, 157–168, doi:10.1016/j.renene.2022.08.114.
65. Somorin, T.; Parker, A.; McAdam, E.; Williams, L.; Tyrrel, S.; Kolios, A.; Jiang, Y. Pyrolysis Characteristics and Kinetics of Human Faeces, Simulant Faeces and Wood Biomass by Thermogravimetry–Gas Chromatography–Mass Spectrometry Methods. *Energy Reports* 2020, 6, 3230–3239, doi:10.1016/j.egyr.2020.11.164.

- 
66. Dandamudi, K.P.R.; Muhammed Luboowa, K.; Laideson, M.; Murdock, T.; Seger, M.; McGowen, J.; Lammers, P.J.; Deng, S. Hydrothermal Liquefaction of Cyanidioschyzon Merolae and Salicornia Bigelovii Torr.: The Interaction Effect on Product Distribution and Chemistry. *Fuel* 2020, 277, 118146, doi:10.1016/j.fuel.2020.118146.
  67. Machado, L.M.M.; Lütke, S.F.; Perondi, D.; Godinho, M.; Oliveira, M.L.S.; Collazzo, G.C.; Dotto, G.L. Simultaneous Production of Mesoporous Biochar and Palmitic Acid by Pyrolysis of Brewing Industry Wastes. *Waste Manag.* 2020, 113, 96–104, doi:10.1016/j.wasman.2020.05.038.
  68. Ahmad, S.R.; Ghosh, P. A Systematic Investigation on Flavonoids, Catechin,  $\beta$ -Sitosterol and Lignin Glycosides from Saraca Asoca (Ashoka) Having Anti-Cancer & Antioxidant Properties with No Side Effect. *J. Indian Chem. Soc.* 2022, 99, 100293, doi:10.1016/j.jics.2021.100293.
  69. Chen, H.; Shan, R.; Zhao, F.; Gu, J.; Zhang, Y.; Yuan, H.; Chen, Y. A Review on the NO<sub>x</sub> Precursors Release during Biomass Pyrolysis. *Chem. Eng. J.* 2023, 451, 138979, doi:10.1016/j.cej.2022.138979.
